# Supplementary material for: Field Emission of Multi-Walled Carbon Nanotubes from Pt-Assisted Chemical Vapor Deposition
Source: MDPI journal article supplement (doi:10.3390/nano12030575), 2022-02-08
Supplement: s1 [file s1]

# Additional Information

## Field Emission of Multi-Walled Carbon Nanotubes from Pt Assisted Chemical Vapor Deposition

Hongbin Tang , Ruizi Liu , Weijun Huang, Wei Zhu, Weijin Qian, and Changkun Dong\*

Wenzhou Key Lab of Micro-nano Optoelectronic Devices, Wenzhou University, Wenzhou, Zhejiang 325035, People's Republic of China; Tanghb152@163.com (H.T.); liurz@163.com (R.L.); 18857757816@163.com (W.H.); 184511084138@stu.wzu.edu.cn (W.Z.); weijinqian@wzu.edu.cn (W.Q.); \*Correspondence: dck@wzu.edu.cn; Tel: +86-577-86689067 (C.D.)

### Index

**Figure S1.** EDS mapping of Pt coated substrate after heating

**Figure S2.** Field emission uniformity of Pt assisted MWNT film with emission area of 12 mm<sup>2</sup>

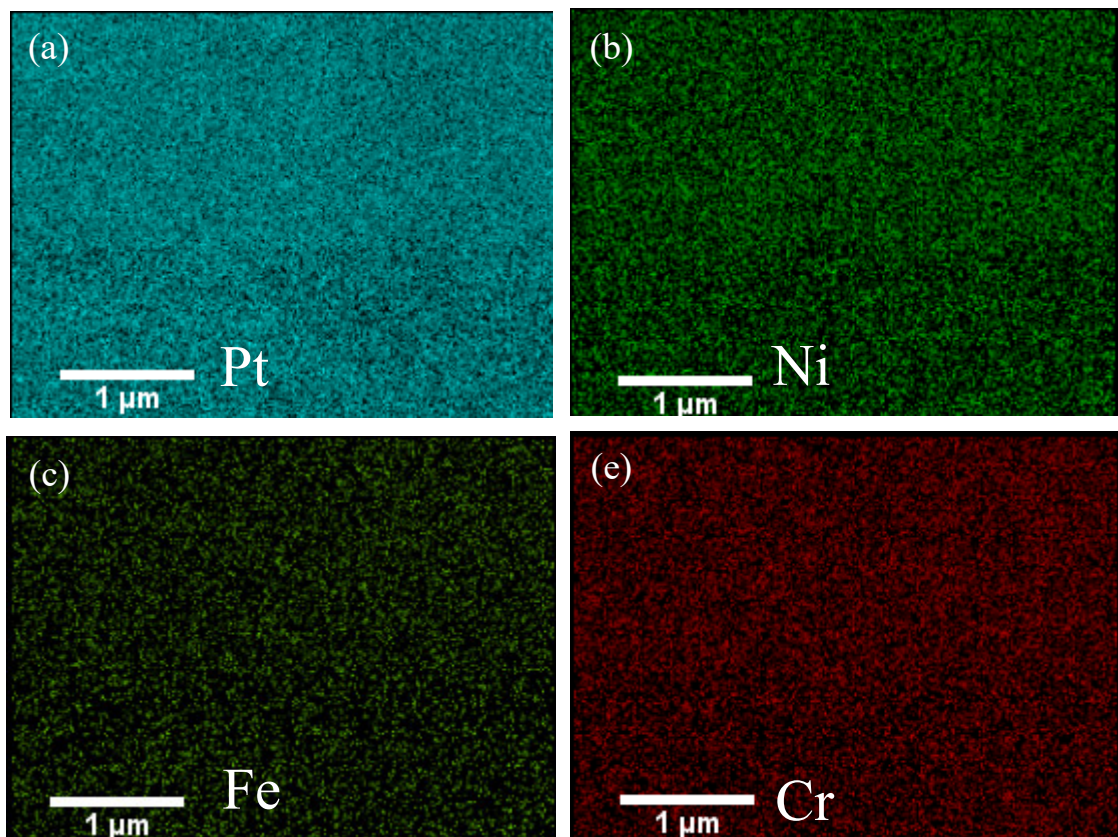

**Figure S1.** EDS mapping of Pt coated substrate after heating

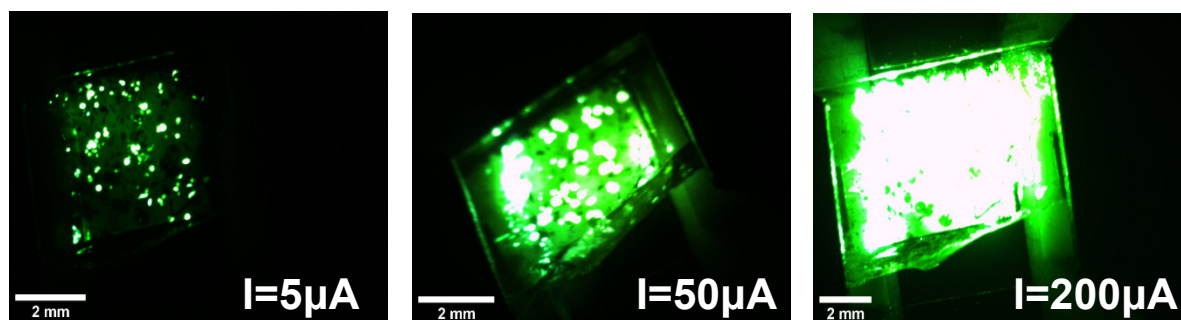

**Figure S2.** Field emission uniformity of Pt assisted MWNT film with emission area of  $12\text{ mm}^2$
